# Supplementary material for: Variability of Metal Levels in Spot, First Morning, and 24-Hour Urine Samples over a 3-Month Period in Healthy Adult Chinese Men
Source: PubMed Central journal article supplement (PMC4829977; doi:10.1289/ehp.1409551), 2015-09-15
Supplement: ehp.1409551.s001.acco.pdf [file ehp.1409551.s001.acco.pdf]

**Note to Readers:** *EHP* strives to ensure that all journal content is accessible to all readers. However, some figures and Supplemental Material published in *EHP* articles may not conform to 508 standards due to the complexity of the information being presented. If you need assistance accessing journal content, please contact [ehp508@niehs.nih.gov](mailto:ehp508@niehs.nih.gov). Our staff will work with you to assess and meet your accessibility needs within 3 working days.

## **Supplemental Material**

# **Variability of Metal Levels in Spot, First Morning, and 24-Hour Urine Samples over a 3-Month Period in Healthy Adult Chinese Men**

Yi-Xin Wang, Wei Feng, Qiang Zeng, Yang Sun, Peng Wang, Ling You, Pan Yang, Zhen Huang, Song-Lin Yu, and Wen-Qing Lu

### **Table of Contents**

**Table S1.** Basic characteristics of the 11 men during the sampling days.

**Table S2.** Uncorrected ( $\mu\text{g/L}$ ), creatinine-corrected ( $\mu\text{g/g creatinine}$ ) and urinary excretion rate (UER) ( $\mu\text{g/h}$ ) of metals in spot, first morning and 24-h urine samples collected from 11 men.

**Table S3.** The variance apportionment of  $\log_{10}$ -transformed creatinine concentrations in the three sample types collected from 11 adults.

**Table S1.** Basic characteristics of the 11 men during the sampling days.

| Characteristics                                     | P1            | P2            | P3       | P4       | P5       | P6       | P7       | P8       | P9            | P10           | P11      |
|-----------------------------------------------------|---------------|---------------|----------|----------|----------|----------|----------|----------|---------------|---------------|----------|
| Age (years)                                         | 28            | 25            | 24       | 23       | 24       | 23       | 24       | 24       | 21            | 21            | 23       |
| Height (m)                                          | 169           | 178           | 170      | 168      | 177      | 173      | 173      | 175      | 173           | 178           | 177      |
| Wight (kg)                                          | 54            | 72            | 55       | 67       | 58       | 70       | 65       | 68       | 75            | 70            | 66       |
| BMI (kg/m <sup>2</sup> )                            | 18.9          | 22.7          | 19.0     | 23.7     | 18.5     | 23.4     | 21.7     | 22.2     | 25.1          | 22.1          | 21.1     |
| Profession                                          | PhD candidate | PhD candidate | Graduate | Graduate | Graduate | Graduate | Graduate | Graduate | Undergraduate | Undergraduate | Graduate |
| Smoking                                             | No            | No            | No       | No       | No       | No       | No       | No       | No            | No            | No       |
| Dietary supplements                                 | No            | No            | No       | No       | No       | No       | No       | No       | No            | No            | No       |
| Seafood consumption <sup>a</sup>                    | No            | No            | No       | No       | No       | No       | No       | No       | No            | No            | No       |
| Fish consumption                                    | No            | Once          | No       | No       | No       | No       | No       | Once     | No            | Once          | No       |
| Average volume of voids (mL)                        | 164.1         | 212.3         | 230.9    | 117.0    | 249.2    | 295.6    | 159.9    | 178.7    | 198.3         | 220.9         | 219.8    |
| Average frequency of voids (times/day) <sup>b</sup> | 6.9           | 3.0           | 5.8      | 9.1      | 4.5      | 4.1      | 6.4      | 6.1      | 7.0           | 5.3           | 8.0      |

Graduate: Graduate student. <sup>a</sup>Seafood does not include fish. <sup>b</sup>A total of 529 spot urine samples were finally collected (6 missing spot samples), including 88 first morning urine samples.

**Table S2.** Uncorrected ( $\mu\text{g/L}$ ), creatinine-corrected ( $\mu\text{g/g}$  creatinine) and urinary excretion rate (UER) ( $\mu\text{g/h}$ ) of metals in spot, first morning and 24-h urine samples collected from 11 men.

| Exposure variables          | Spot sample ( $n=529$ ) |        |               | First morning sample ( $n=88$ ) |        |               | 24-h collection ( $n=88$ ) |        |               |
|-----------------------------|-------------------------|--------|---------------|---------------------------------|--------|---------------|----------------------------|--------|---------------|
|                             | Mean                    | Median | Interquartile | Mean                            | Median | Interquartile | Mean                       | Median | Interquartile |
| <b>Uncorrected</b>          |                         |        |               |                                 |        |               |                            |        |               |
| As                          | 25.71                   | 19.86  | 11.11-34.63   | 41.95                           | 36.69  | 22.00-48.90   | 26.13                      | 20.38  | 17.25-25.32   |
| Cd                          | 0.53                    | 0.42   | 0.27-0.68     | 0.82                            | 0.70   | 0.40-1.05     | 0.51                       | 0.43   | 0.32-0.67     |
| Co                          | 0.21                    | 0.16   | 0.10-0.24     | 0.30                            | 0.23   | 0.15-0.35     | 0.20                       | 0.17   | 0.12-0.22     |
| Cu                          | 11.36                   | 8.54   | 5.98-12.58    | 14.96                           | 12.09  | 9.00-17.93    | 11.78                      | 9.53   | 7.05-13.56    |
| Pb                          | 3.49                    | 2.75   | 1.92-3.50     | 3.30                            | 3.16   | 2.42-3.57     | 3.42                       | 2.85   | 2.33-3.80     |
| Mo                          | 98.46                   | 80.02  | 44.23-132.63  | 122.77                          | 106.86 | 71.45-149.00  | 92.24                      | 81.41  | 59.8-109.98   |
| Ni                          | 2.34                    | 1.67   | 0.83-2.70     | 3.23                            | 2.24   | 1.48-3.54     | 2.27                       | 1.76   | 1.14-2.50     |
| <b>Creatinine-corrected</b> |                         |        |               |                                 |        |               |                            |        |               |
| As                          | 21.72                   | 20.57  | 16.05-24.38   | 24.02                           | 22.52  | 18.18-26.14   | 22.87                      | 21.23  | 18.18-24.53   |
| Cd                          | 0.49                    | 0.43   | 0.31-0.61     | 0.48                            | 0.42   | 0.32-0.61     | 0.48                       | 0.44   | 0.31-0.61     |
| Co                          | 0.20                    | 0.16   | 0.13-0.22     | 0.18                            | 0.14   | 0.11-0.19     | 0.19                       | 0.16   | 0.13-0.21     |
| Cu                          | 11.80                   | 8.59   | 6.47-11.98    | 9.70                            | 7.89   | 6.22-10.51    | 11.21                      | 9.68   | 7.50-12.54    |
| Pb                          | 3.96                    | 2.64   | 1.85-3.90     | 2.14                            | 1.81   | 1.41-2.33     | 3.26                       | 2.83   | 2.17-3.63     |
| Mo                          | 89.42                   | 80.62  | 54.77-112.01  | 74.26                           | 72.61  | 49.85-97.95   | 85.98                      | 87.40  | 59.75-105.49  |
| Ni                          | 2.36                    | 1.51   | 0.93-2.46     | 2.01                            | 1.44   | 0.90-2.09     | 2.16                       | 1.61   | 1.20-2.46     |
| <b>UER</b>                  |                         |        |               |                                 |        |               |                            |        |               |
| As                          | 1.16                    | 1.05   | 0.76-1.31     | 1.14                            | 1.00   | 0.79-1.28     | 1.14                       | 0.99   | 0.82-1.26     |
| Cd                          | 0.03                    | 0.02   | 0.02-0.03     | 0.02                            | 0.02   | 0.02-0.03     | 0.02                       | 0.02   | 0.02-0.03     |
| Co                          | 0.01                    | 0.01   | 0.006-0.01    | 0.01                            | 0.01   | 0.005-0.01    | 0.01                       | 0.01   | 0.006-0.01    |
| Cu                          | 0.63                    | 0.45   | 0.32-0.61     | 0.44                            | 0.35   | 0.28-0.49     | 0.54                       | 0.45   | 0.37-0.59     |
| Pb                          | 0.21                    | 0.13   | 0.09-0.21     | 0.10                            | 0.08   | 0.06-0.11     | 0.16                       | 0.13   | 0.10-0.18     |
| Mo                          | 4.73                    | 3.97   | 2.63-6.10     | 3.45                            | 3.26   | 2.31-4.41     | 4.21                       | 3.99   | 3.22-5.25     |
| Ni                          | 0.12                    | 0.08   | 0.04-0.13     | 0.10                            | 0.07   | 0.04-0.10     | 0.11                       | 0.08   | 0.06-0.11     |

**Table S3.** The variance apportionment of log<sub>10</sub>-transformed creatinine concentrations in the three sample types collected from 11 adults.

| Type of sample                                         | Total samples<br>(n=529) | Days apart<br>(n=326) | Months apart<br>(n=265) |
|--------------------------------------------------------|--------------------------|-----------------------|-------------------------|
| <b>Spot sample</b>                                     |                          |                       |                         |
| ICC                                                    | 0.12                     | 0.09                  | 0.15                    |
| Between persons $\sigma^2$ (%) <sup>a</sup>            | 0.008 (12%)              | 0.005 (9%)            | 0.011 (15%)             |
| Within person, between day $\sigma^2$ (%) <sup>b</sup> | 0.001 (2%)               | 0.001 (2%)            | 0.001 (1%)              |
| Within person, within day $\sigma^2$ (%) <sup>c</sup>  | 0.058 (86%)              | 0.052 (89%)           | 0.063 (84%)             |
| <b>First morning sample<sup>d</sup></b>                |                          |                       |                         |
| ICC                                                    | 0.55                     | 0.49                  | 0.62                    |
| Between person $\sigma^2$ (%) <sup>a</sup>             | 0.021 (55%)              | 0.020 (49%)           | 0.027 (62%)             |
| Within person $\sigma^2$ (%) <sup>b</sup>              | 0.017 (45%)              | 0.019 (51%)           | 0.015 (38%)             |
| <b>24-h collection<sup>d</sup></b>                     |                          |                       |                         |
| ICC                                                    | 0.53                     | 0.54                  | 0.61                    |
| Between person $\sigma^2$ (%) <sup>a</sup>             | 0.009 (53%)              | 0.007 (54%)           | 0.014 (61%)             |
| Within person $\sigma^2$ (%) <sup>b</sup>              | 0.008 (47%)              | 0.006 (46%)           | 0.009 (39%)             |

Days apart: days 0, 1, 2, 3, and 4; months apart: days 0, 30, 60, and 90.  $\sigma^2$ = variance. <sup>a</sup>The proportion of between-person variance to the total variance. <sup>b</sup>The proportion of within-person between-day variance to the total variance. <sup>c</sup>The proportion of within-person within-day variance to the total variance. <sup>d</sup>For first morning and 24-h urine collections, the distinction between within-day vs. between-day variability is not applicable with only one measurement per day.
